# Supplementary material for: CO2-actuated spin transition tuning in an interdigitated Hofmann-type coordination polymer
Source: Royal Society of Chemistry journal article supplement (doi:10.1039/d4sc04266b), 2024-01-01
Supplement: d4sc04266b1.pdf [file d4sc04266b1.pdf]

## Supporting Information

# CO<sub>2</sub>-actuated Spin Transition Tuning in an Interdigitated Hofmann-type Coordination Polymer

Abhik Paul,<sup>a</sup> Wataru Kosaka,<sup>bc</sup> Bhart Kumar,<sup>a†</sup> Dibya Jyoti Mondal,<sup>a†</sup> Hitoshi Miyasaka,<sup>\*bc</sup>  
Sanjit Konar<sup>\*a</sup>

<sup>a</sup>Molecular Magnetism Lab, Department of Chemistry, Indian Institute of Science Education and Research, Bhopal, Madhya Pradesh, India-462066. E-mail: [skonar@iiserb.ac.in](mailto:skonar@iiserb.ac.in)

<sup>b</sup>Institute for Materials Research, Tohoku University, 2-1-1 Katahira, Aoba-ku, Sendai 980-8577, Japan.

<sup>c</sup>Department of Chemistry, Graduate School of Science, Tohoku University, 6-3 Aramaki-Aza-Aoba, Aoba-ku, Sendai 980-8578, Japan. E-mail: [miyasaka@imr.tohoku.ac.jp](mailto:miyasaka@imr.tohoku.ac.jp)

†these authors contributed equally.

### Table of contents for supplementary Information

1. Materials and methods
2. Physical properties of framework **1**
3. CO<sub>2</sub> adsorption of framework **1** and the effects on the spin transition of **1**
4. In situ VT-PXRD of **1** under CO<sub>2</sub>
5. Crystallographic details of **1**·CS<sub>2</sub>
6. References

## **Materials and Methods:**

All chemicals and reagents were of analytical grade and were used as received from commercial sources. Framework 1 was obtained and characterised using a previously reported procedure.<sup>1</sup>

**Synthesis of framework 1·1.3MeOH.** A bulk crystalline sample of **1·1.3MeOH** was prepared by liquid-to-liquid slow diffusion technique. The ligand methyl isonicotinate (12 mg, 0.084 mmol) and  $K_2[Pd(CN)_4] \cdot xH_2O$  (12.1 mg, 0.042 mmol) were taken in methanolic solution and placed on the top layer, and aqueous solution of  $Fe(ClO_4)_2 \cdot 6H_2O$  (15.2 mg, 0.042 mmol) was placed in the bottom layer. The layering tubes were kept separately for crystallisation without any disturbance. Yellow hexagonal plate crystals of **1·1.3MeOH** formed in quantitative yield over 6 weeks. IR (solid,  $\nu/cm^{-1}$ ) 3336.8 (br), 2167.4 (sh), 1634.4 (br), 1510.3 (w), 1433.3 (sh), 1383.8 (w), 1325.5 (w), 1288.4 (w), 1208.2 (w), 1170.8 (w), 1054.0 (sh), 998.6 (w), 960.7 (w). CHN calcd. (for  $C_{20}H_{22}FeN_6O_6Pd$ ): C, 39.72; H, 3.67; N, 13.90. Found: C, 39.65; H, 3.61; N, 13.50.

**Synthesis of framework 1.** To obtain completely desolvated framework **1**, a bulk quantity of single crystals of **1·1.3MeOH** was taken in a vial and heated at 180 °C under vacuum for 3 hours, according to TGA). The completion of the desolvation process was confirmed by IR spectroscopy and elemental analysis. IR (solid,  $\nu/cm^{-1}$ ) 3006.8 (w), 2167.8 (sh), 1636.4 (br), 1512.3 (br), 1380.7 (sh), 1322.7 (w), 1208.2 (w), 1170.8 (w), 1053.0 (sh), 996.6 (w), 962.7 (w). CHN calculated. (for  $C_{18}H_{14}FeN_6O_4Pd$ ): C, 39.95; H, 2.68; N, 15.59; obtained: C, 39.60; H, 2.38; N, 15.30.

**Synthesis of framework 1·CS<sub>2</sub>.** A bulk crystalline sample of **1·CS<sub>2</sub>** was prepared by a similar liquid-to-liquid slow diffusion technique as **1·1.3MeOH**, using a methanolic solution of CS<sub>2</sub> as the buffer layer.

## **Physical Measurement:**

**Fourier Transform Infrared Spectroscopy.** The FT-IR experiments were carried out using a Perkin Elmer spectrometer and attenuated total reflection (ATR) correction setup has been done between the range of 400–4000  $cm^{-1}$ . To guarantee optimal optical contact, the powdered samples were squeezed between a diamond crystal and a bridge-clamped sapphire anvil. The peaks were assigned based on the reported literature.

**Thermogravimetric Analysis.** The thermal stability of the samples was analysed with a Perkin Elmer TGA-6000 thermobalance operating at a heating rate of 5 K  $min^{-1}$ , under dry N<sub>2</sub> atmosphere.

**Powder XRD.** Powder X-ray diffraction patterns of the samples (framework **1** and **1·1.3MeOH**) were obtained at 298 K on PANalytical Empyrean X-Ray Diffractometer with a Cu K $\alpha$  radiation ( $\lambda=1.54060\text{\AA}$ ). The bulk powder of each sample was placed on a silica sample holder and measured by a continuous scan between 5–50° with a step size of 0.013103°.

**In-situ VT-PXRD.** The ground sample was sealed in a soda-lime glass capillary with an inner diameter of 0.5 mm. The PXRD pattern was obtained in the range 5–50° with 0.05° steps using a Rigaku Ultima IV diffractometer with Cu K $\alpha$  radiation ( $\lambda = 1.5418 \text{\AA}$ ). To obtain the PXRD patterns under gas-adsorbed conditions, the glass capillary was connected to stainless steel lines that possessed valves to dose and remove gas, which were connected to a gas-handling system (BELSORP MINI X, MicrotracBEL). Temperature dependence of PXRD patterns was collected under fixed gas pressure (100 kPa of He or 100, 32, 10, and 3.2 kPa of CO<sub>2</sub>). The temperature was controlled using a stream of

N<sub>2</sub> gas. Unlike in-situ measurements in a SQUID, the lower limit of the measurement temperature is limited by the sublimation temperature of CO<sub>2</sub> since the formation of solid CO<sub>2</sub> breaks glass capillaries.

**Single Crystal X-ray Diffraction (SCXRD)** Single Crystal X-ray diffraction data were collected on Bruker D8 Venture diffractometer using monochromated Mo K $\alpha$  radiation ( $\lambda = 0.71073 \text{ \AA}$ ) at 100 K using an Oxford Cryostream low-temperature device. Unit cell measurements, data integration, scaling and absorption corrections for the crystals were done with Bruker APEX-3 software. Data reduction was carried out with Bruker SAINT suite. Absorption correction was performed by the multi-scan method implemented in SADABS. All the crystal structures were solved by direct methods using SIR 2014. The crystal structure refinements were done in the program package Olex2,<sup>1</sup> and all non-hydrogen atoms were refined anisotropically by full-matrix least-squares calculations based on F2 with SHELXL-2018.<sup>2</sup> Some hydrogen atoms were located from the difference Fourier Map, while the remaining hydrogen atoms were included in calculated positions as riding atoms. Details of crystal data, data collection, and refinement details are given in Table S3-S6.

**Gas adsorption measurements.** The sorption isotherm and isobar measurements for N<sub>2</sub>, O<sub>2</sub>, and CO<sub>2</sub> were carried out using an automatic volumetric adsorption apparatus (BELSORP MAX, MicrotracBEL) connected to a cryostat system (ULVAC-Cryo). A known weight (~40 mg) of **1** was placed into the sample cell, which was again evacuated before measurements for 12 h at 430 K. Then the change in pressure was monitored, and the degree of adsorption was determined based on the decrease in pressure at the equilibrium state. When the reading of the pressure gauge for 500 seconds was within 0.3%, the system was judged to have reached adsorption equilibrium.

**Magnetic Susceptibility Measurements.** Magnetic measurements of framework **1** were performed using a Quantum Design MPMS2 SQUID magnetometer equipped with a 7 T magnet, operating at 1000 Oe at the temperature range of 2–300 K. The measured values were corrected for the experimentally measured contribution of the sample holder, whereas the derived susceptibilities were corrected for the diamagnetic contribution of the sample, estimated from Pascal's tables.

**Magnetic measurements under CO<sub>2</sub> atmosphere** were performed using a home-built sealed gas cell.

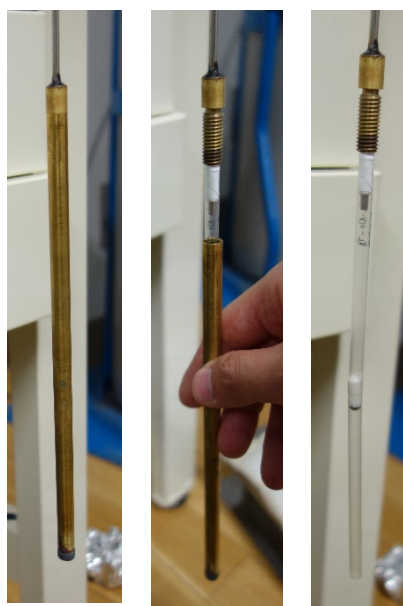

CO<sub>2</sub> gas was filled at RT to each pressure, then M-T curves were measured in the range 300-10 K at 1000 Oe and sweep mode (0.5 K min<sup>-1</sup>). For the measurement without CO<sub>2</sub> (CO<sub>2</sub> = 0 kPa) in a sealed cell, 100 kPa of He gas was introduced to enhance thermal conductivity instead of vacuum, followed by the measurement under different CO<sub>2</sub> pressure in the order of 100 kPa, 32 kPa, 10 kPa, 3.2 kPa, 1 kPa, and He (2<sup>nd</sup>), to check the sample was reverted back to its original state.

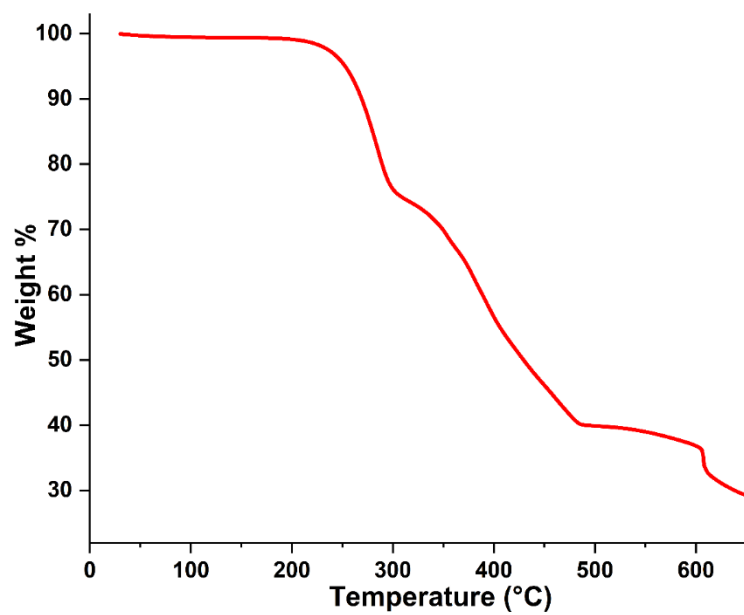

**Figure S1.** Thermogravimetric analysis of framework 1.

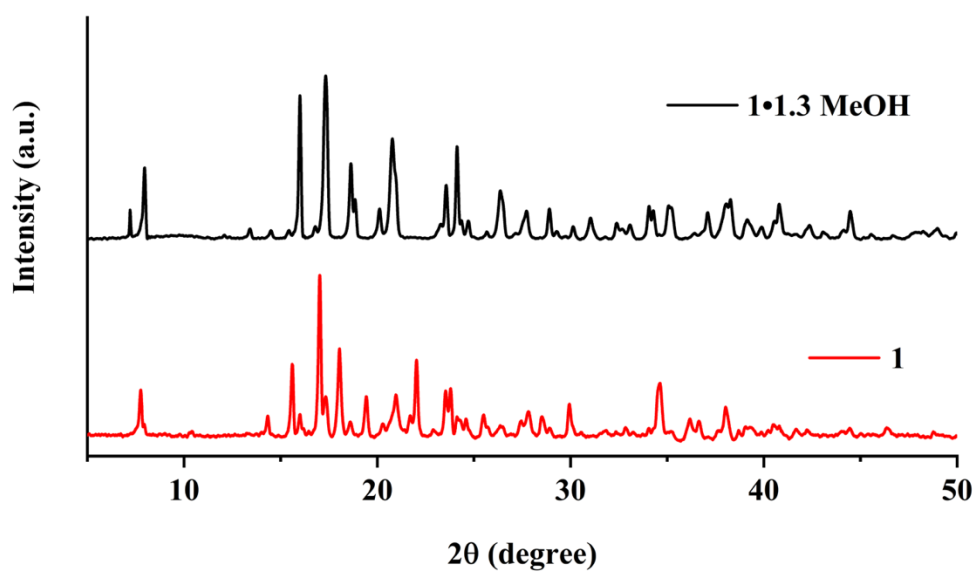

**Figure S2.** Comparative PXRD spectrum of the parent framework 1·1.3MeOH (black) and 1 (red).

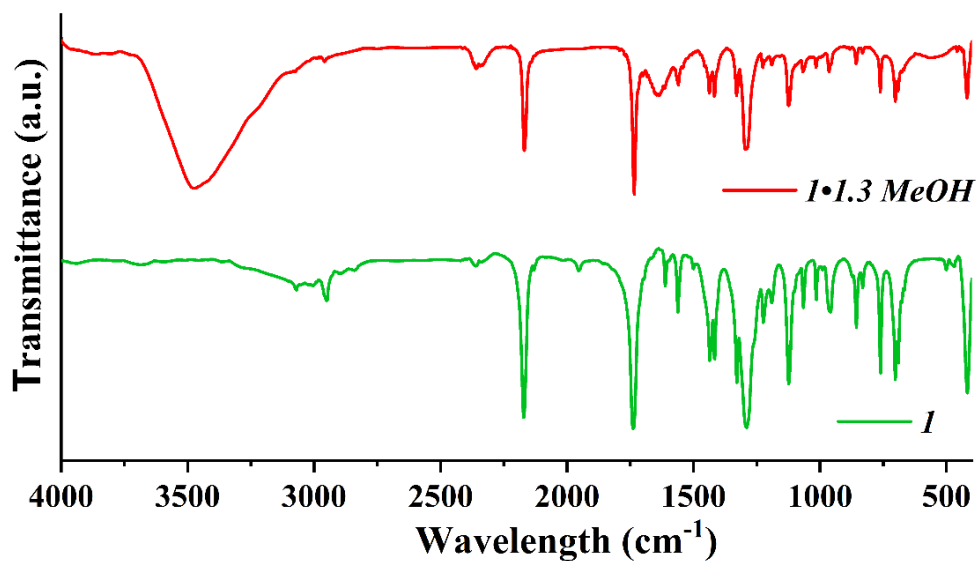

**Figure S3.** Comparative FTIR spectra of framework 1·1.3MeOH (red) and framework 1 (green).

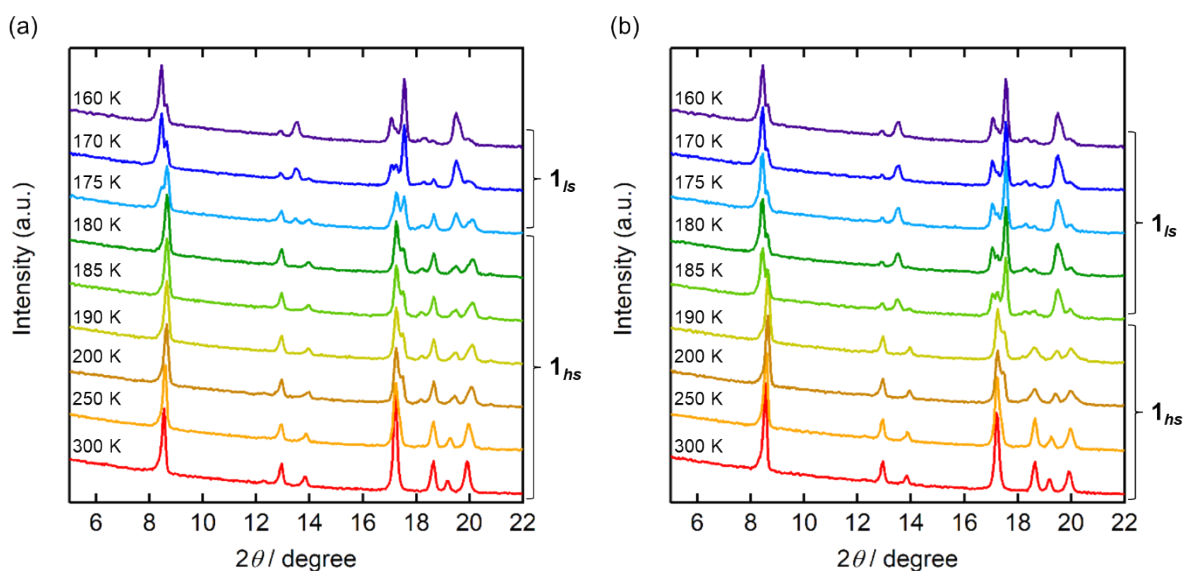

**Figure S4.** Variable temperature PXRD measurement of framework 1 under He in the temperature range of 160-300 K in the (a) cooling and (b) heating process. To avoid the influence of diffraction peaks from ice adhering to the capillary, only the region below 22° is shown.

## Gas adsorption measurements

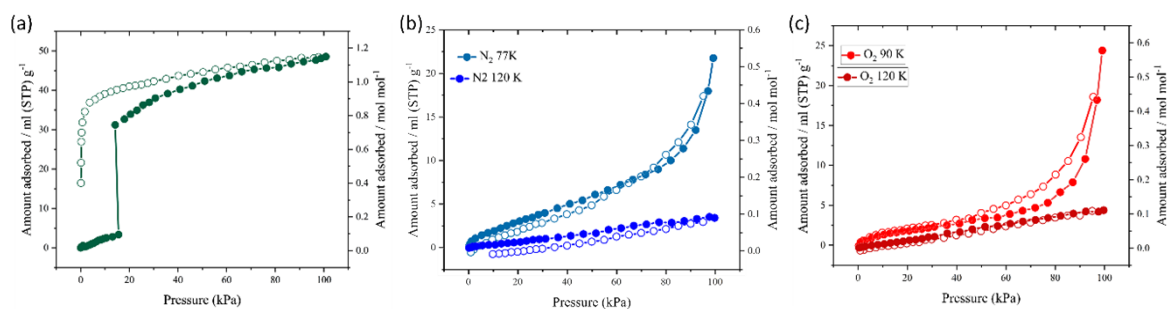

**Figure S5.** Adsorption isotherm of framework **1** under different adsorbent gases (a) CO<sub>2</sub> at 195 K, (b) N<sub>2</sub> at 77 K and 120 K, and (c) O<sub>2</sub> at 90 K and 120 K, respectively. Closed and Open circles correspond to desorption and adsorption, respectively.

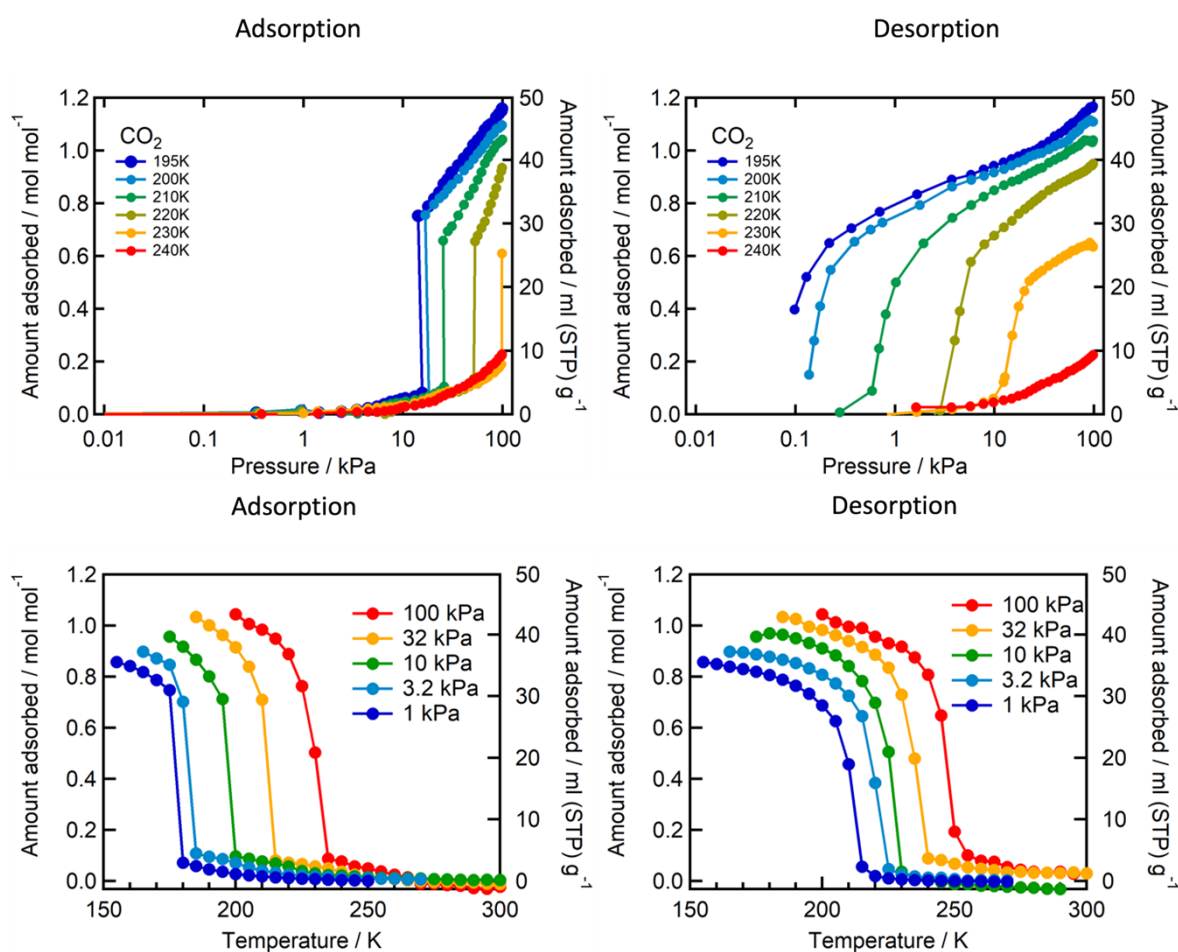

**Figure S6.** (top) CO<sub>2</sub> adsorption isotherms and (bottom) isobars of framework **1** at different temperatures and CO<sub>2</sub> pressures, respectively. Solid lines are only a guide for the eye.

## Temperature dependence of the gated sorption pressure

The relationship between the GO/GC pressure and temperature was investigated in  $\ln(P)$  vs.  $T^{-1}$  plots based on the Clausius-Clapeyron equation

$$\frac{d(\ln P)}{dT^{-1}} = \frac{\Delta H_{trans}}{R_g} \quad \text{---- Eq 1}$$

Where  $\Delta H_{trans}$  is the transition enthalpy and  $R$  is the universal gas constant. Notably, the Clausius-Clapeyron equation is valid under an equilibrium condition, and hence it might not be suitable for applying to the present hysteretic behaviour. However, it was also theoretically revealed that the  $\ln P$  vs.  $T^{-1}$  plots have a linear correlation even in the system showing hysteretic transition.<sup>2</sup>

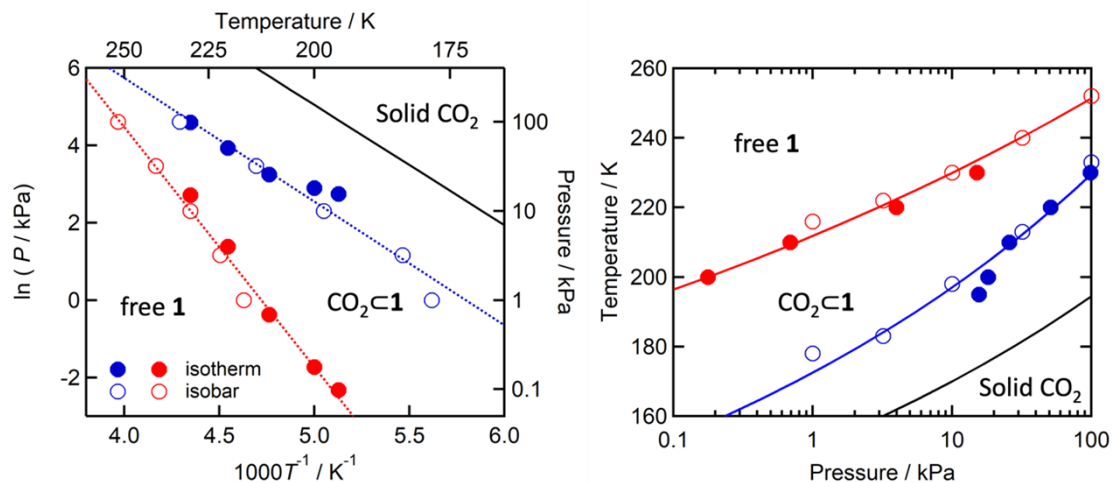

**Figure S7.** (left) Log-scale plots of the CO<sub>2</sub> pressure where GO (blue) and GC (red) occur vs. the inverse of the temperatures for GO/GC based on the CO<sub>2</sub> adsorption/desorption isotherms. The corresponding lines represent the fitting results based on the Clausius-Clapeyron equation 1. (right) Phase diagram for **1** and **1**→CO<sub>2</sub> (**1'**), where the blue and red lines represent the GO and GC, respectively, determined from CO<sub>2</sub> adsorption isotherms (closed circles) and isobars (open circles). The red and blue lines (right) represent the fitting based on the Clausius-Clapeyron equation (Eq 1). The black line represents the saturated vapour pressure curve, which distinguishes between the gas phase and the solid phase for bulk CO<sub>2</sub>.

## Determination of gate-opening/closing pressure under CO<sub>2</sub> ad/desorption at different temperatures

The gate opening (GO) and gate closing (GC) behaviours were observed in the CO<sub>2</sub> adsorption and desorption isotherms, respectively (Figure S6). The GO (or GC) pressures were determined as the peaks in  $dA_{ads}/dP$  plots from adsorption (or desorption) isotherms, where  $A_{ads}$  represents the amount adsorbed.

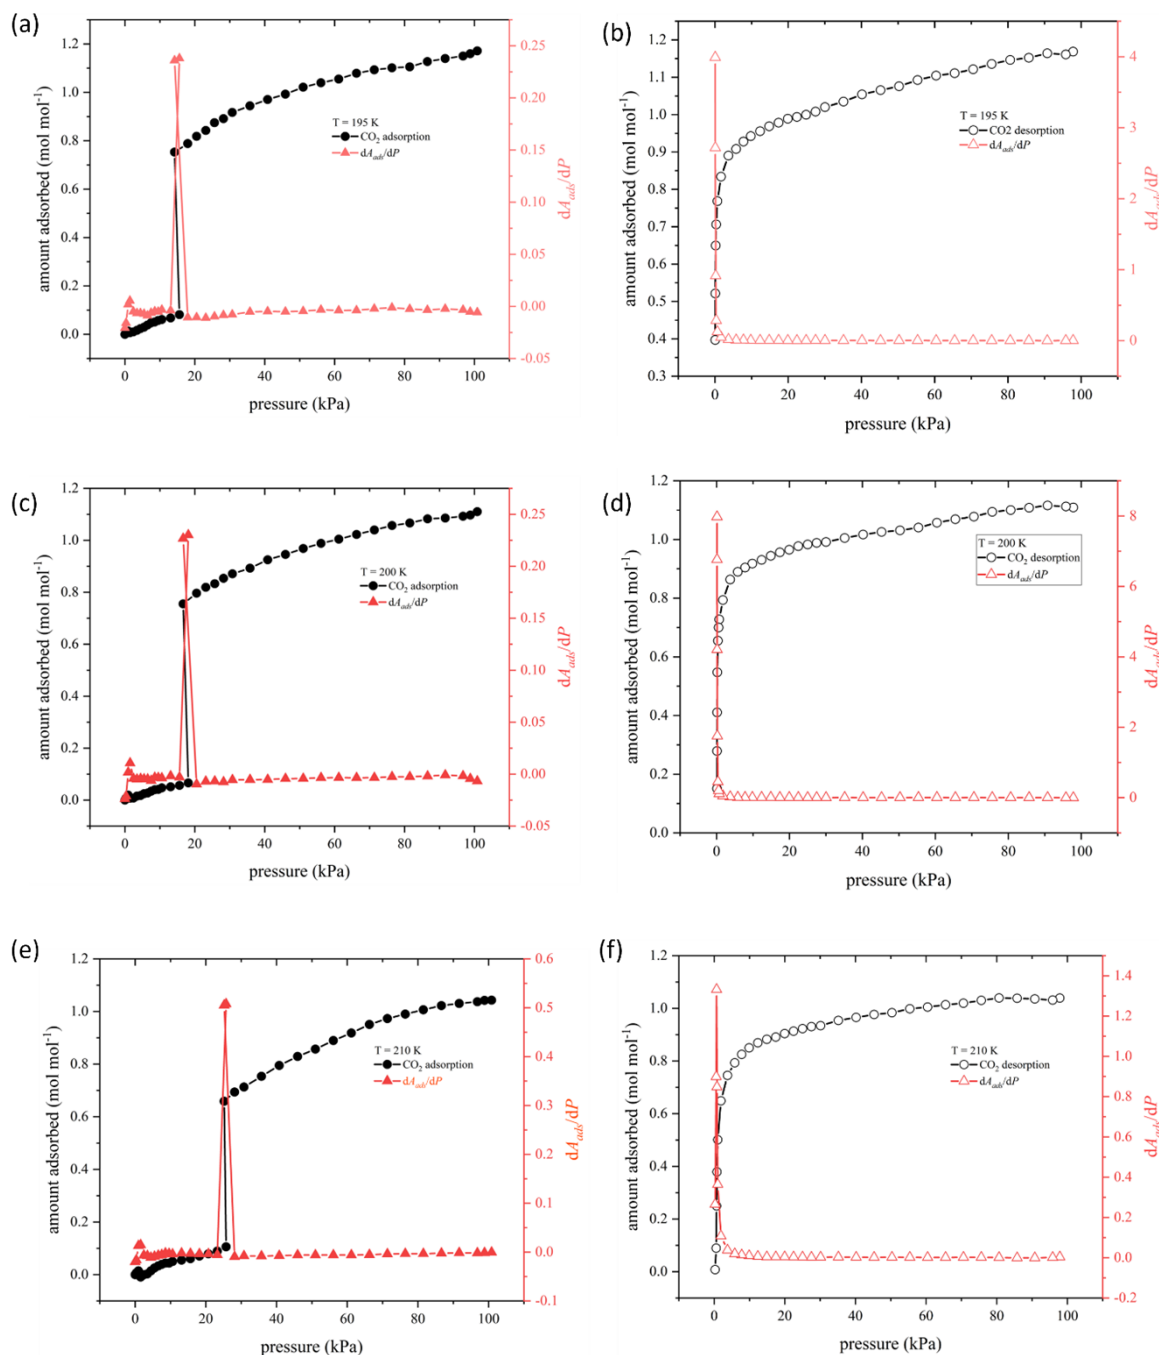

**Figure S8.** CO<sub>2</sub> adsorption (a, c, e) and desorption (b, d, f) isotherms (black) and  $dA_{ads}/dP$  vs.  $P$  plots (red) at 195 K (a, b), 200 K (c, d) and 210 K (e, f).



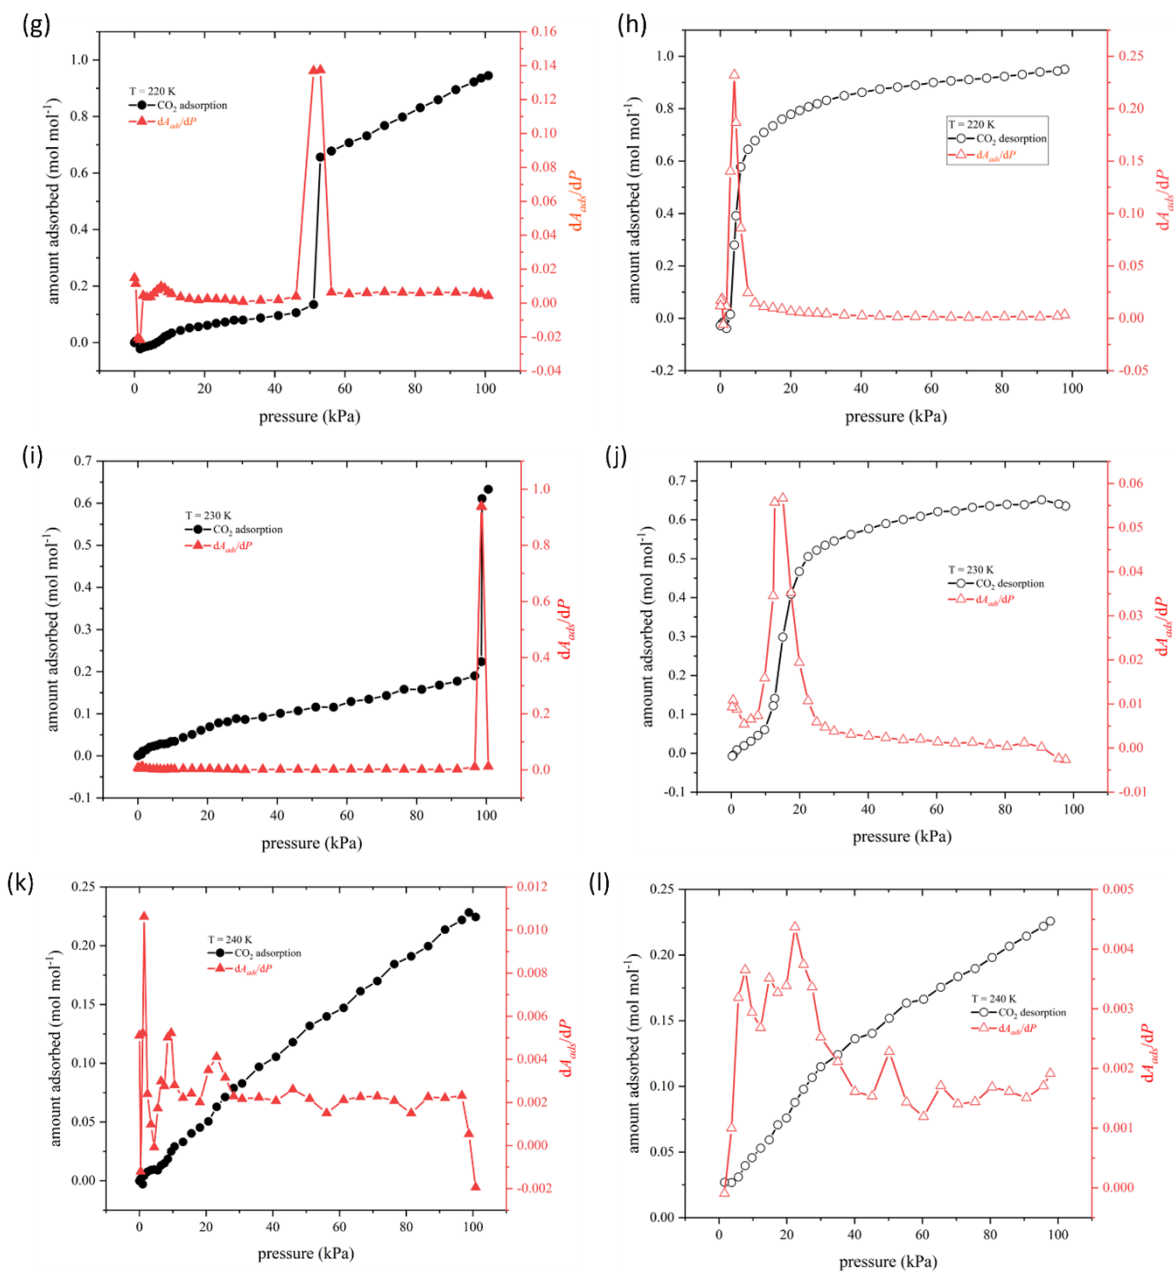

**Figure S8 (continued).** CO<sub>2</sub> adsorption (g, i, k) and desorption (h, j, l) isotherms (black) and  $dA_{ads}/dP$  vs.  $P$  plots (red) at 220 K (g, h), 230 K (i, j) and 240 K (k, l).

## Determination of gate-opening/closing pressure under CO<sub>2</sub> ad/desorption at different pressures

The gate opening (GO) and gate closing (GC) behaviours were observed in the CO<sub>2</sub> adsorption and desorption isobars, respectively (Figure S6). The GO (or GC) pressures were determined as the peaks in  $dA_{ads}/dT$  plots from adsorption (or desorption) isobars, where  $A_{ads}$  represents the amount adsorbed.

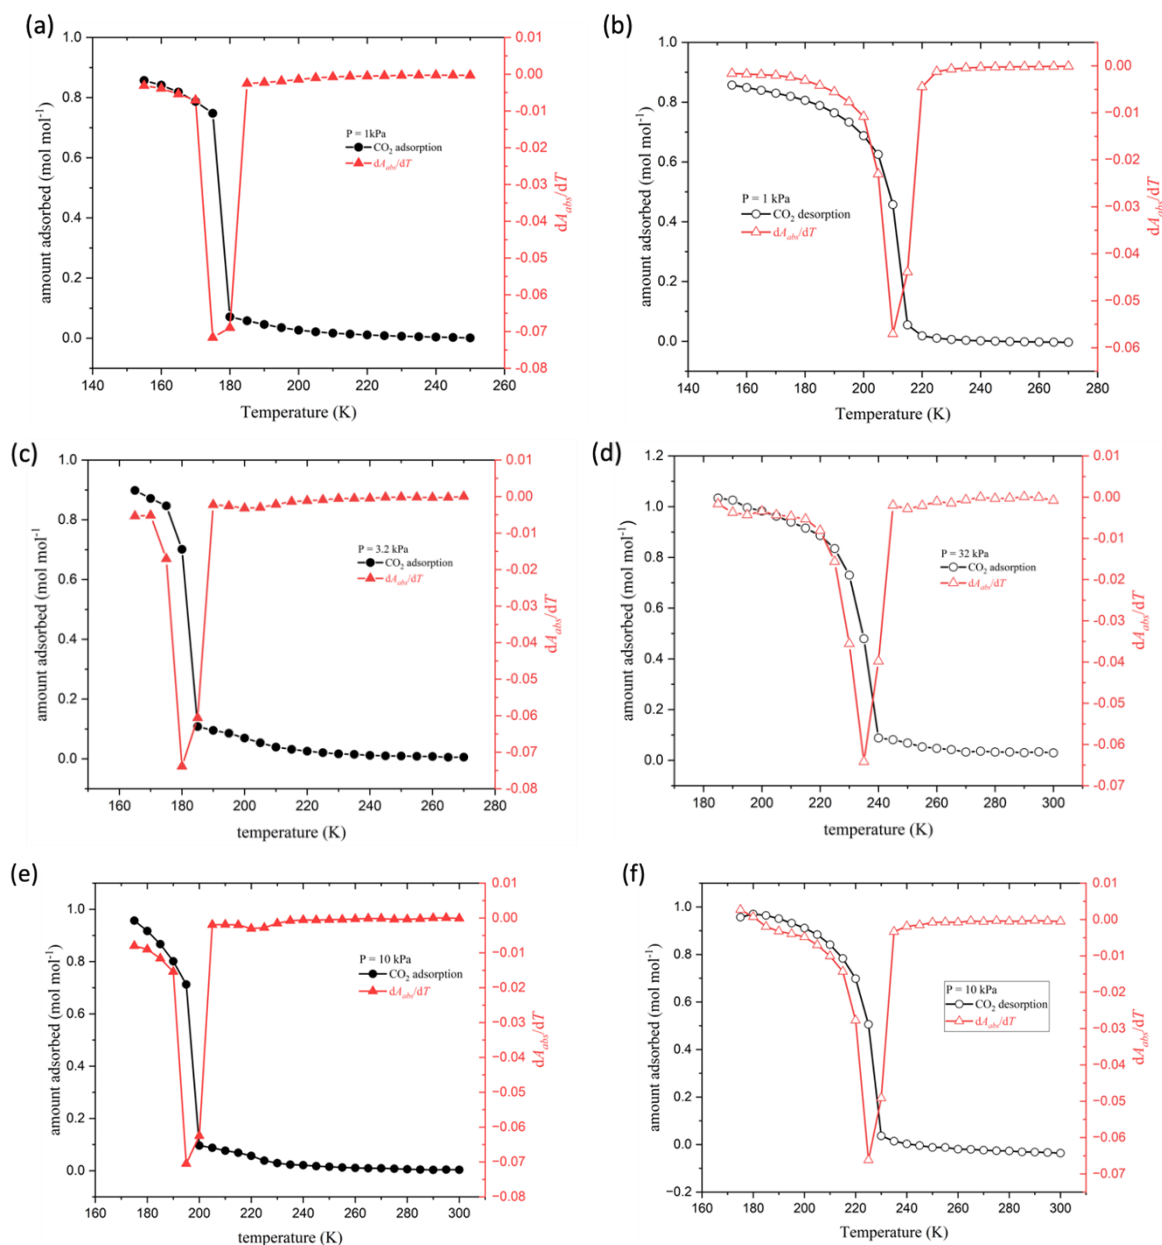

**Figure S9.** CO<sub>2</sub> adsorption (a, c, e) and desorption (b, d, f) isobars (black) and  $dA_{ads}/dT$  vs.  $T$  plots (red) at 1 kPa (a, b), 3.2 kPa (c, d) and 10 kPa (e, f).

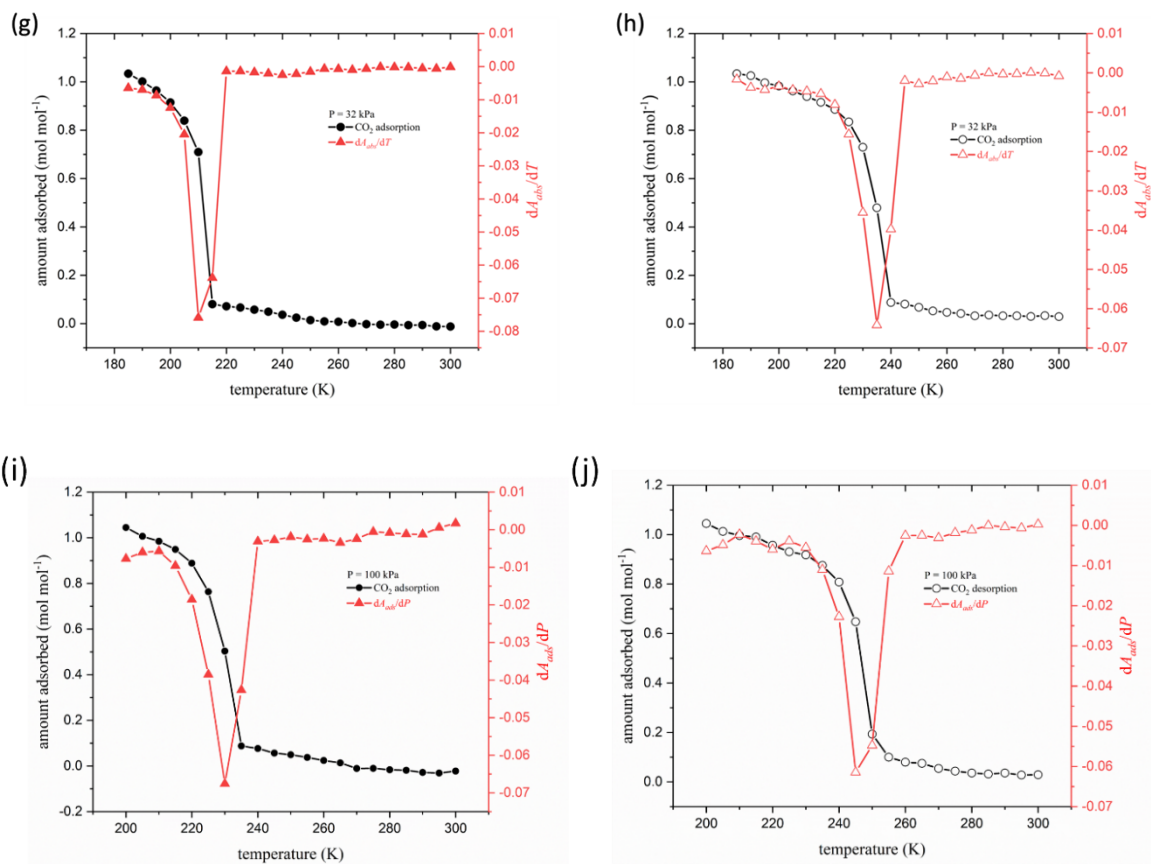

**Figure S9 (continued).** CO<sub>2</sub> adsorption (g, i) and desorption (h, j) isobars (black) and  $dA_{ads}/dT$  vs.  $T$  plots (red) at 32 kPa (g, h) and 100 kPa (i, j).

**SCO transition for framework 1 at different CO<sub>2</sub> pressures.**

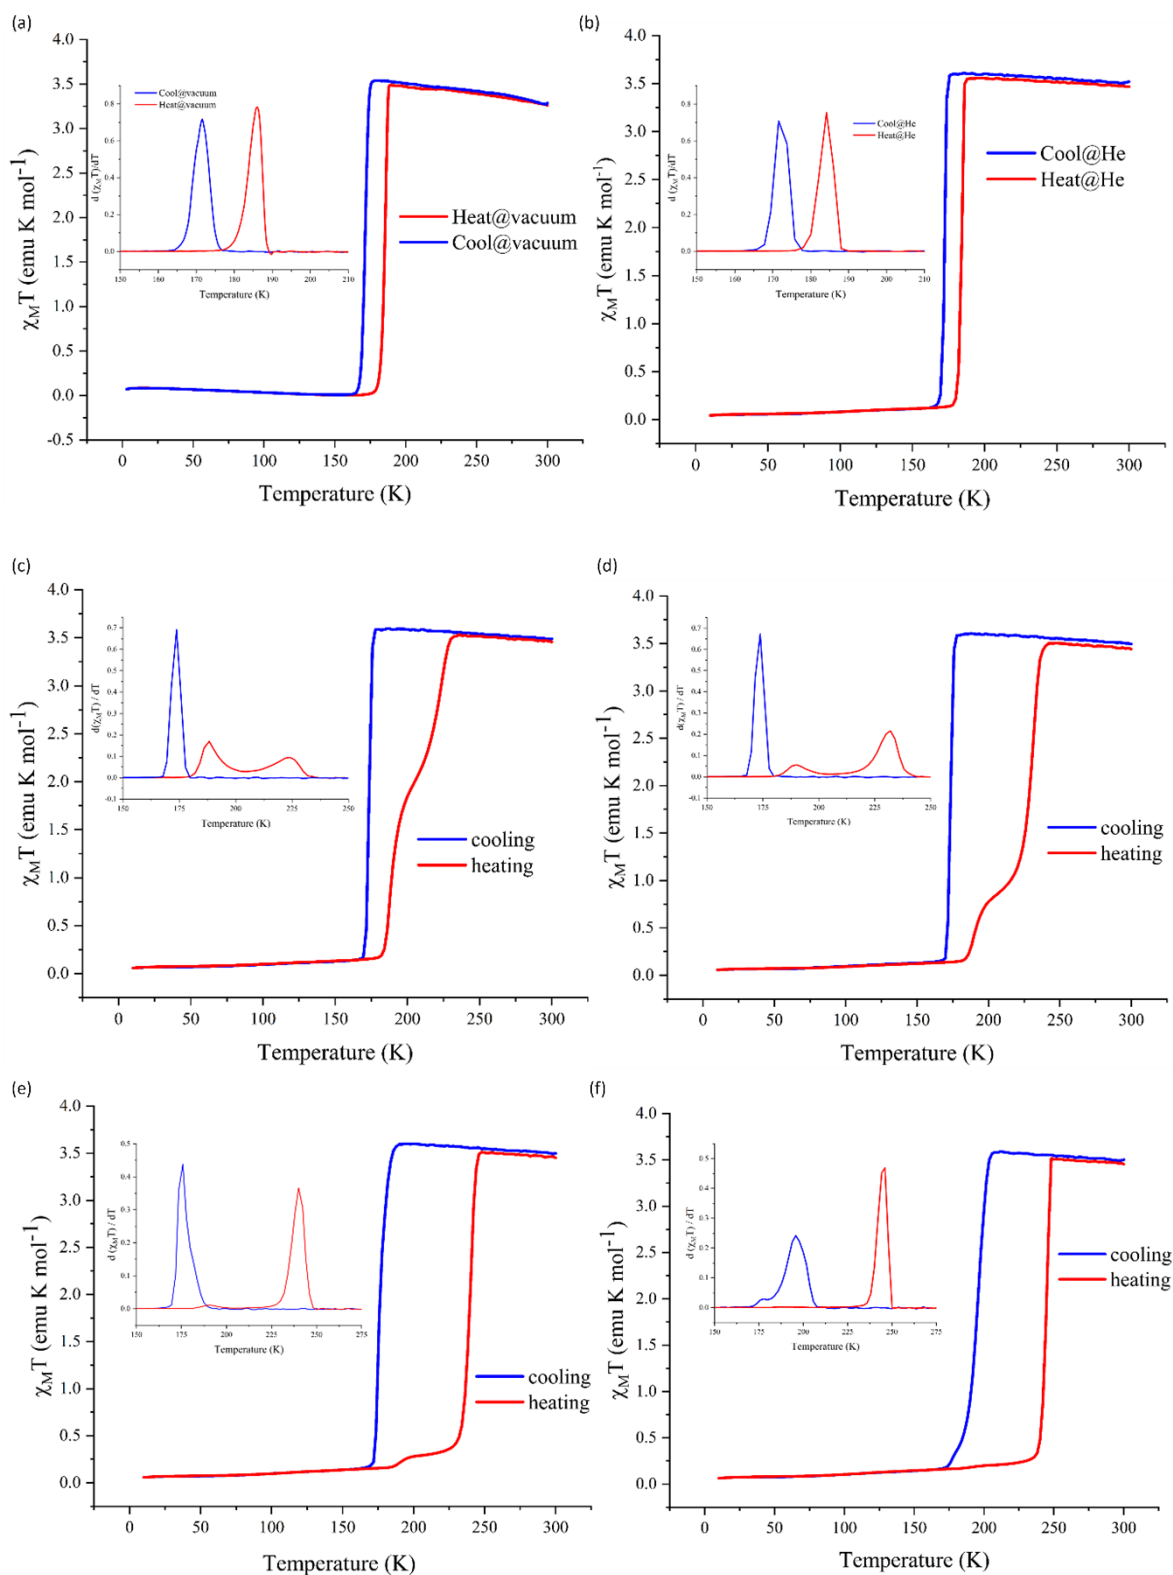

**Figure S 10.** Complete SCO transition for framework 1 in the temperature range of 10-300 K under an external magnetic field ( $H_{dc} = 1.0$  kOe) at different conditions. (a) in absence of any gas (vacuum); (b) under 100 kPa He; (c) under  $P_{CO_2} = 1.0$  kPa; (d)  $P_{CO_2} = 3.2$  kPa; (e) under  $P_{CO_2} = 10.0$  kPa; (f)  $P_{CO_2} = 32.0$  kPa. (inset) transition temperatures as determined from the  $d\chi_M T/dT$  plot.

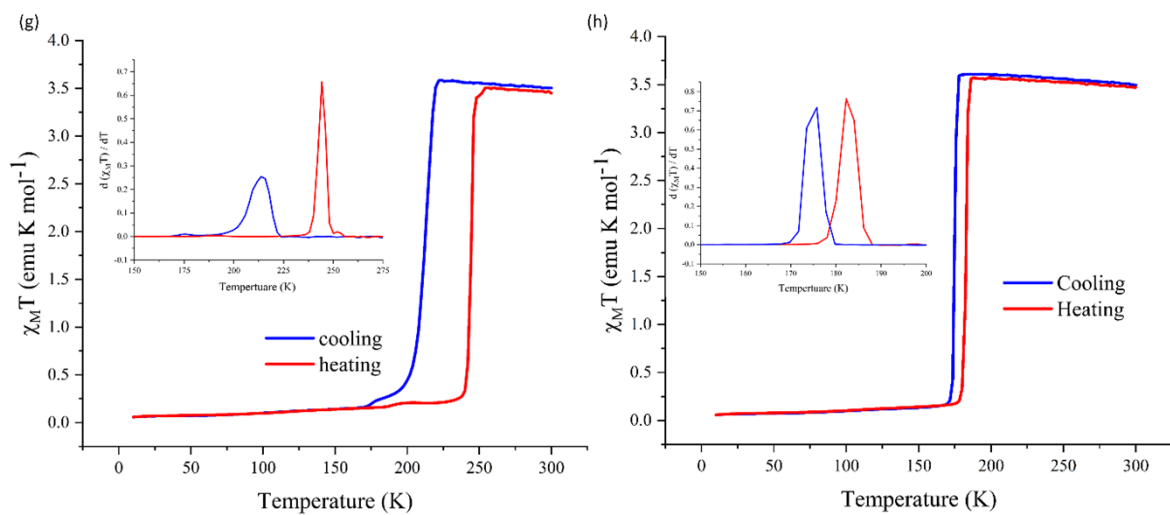

**Figure S10 (continued).** Complete SCO transition for framework **1** in the temperature range of 10-300 K under an external magnetic field ( $H_{dc} = 1.0$  kOe) at (g)  $P_{CO_2} = 100$  kPa; (h)  $P_{CO_2} = 0$  kPa, 100 kPa He (repeated). (inset) transition temperatures as determined from the  $d\chi_M T/dT$  plot.

**Table S1. SCO transition temperatures<sup>a</sup> for framework 1 at different CO<sub>2</sub> pressure.**

| CO <sub>2</sub> Pressure (kPa) | T <sub>H1</sub> | T <sub>H2</sub> | T <sub>C</sub> | ΔT (T <sub>H1</sub> -T <sub>C</sub> ) | ΔT (T <sub>H2</sub> -T <sub>C</sub> ) |
|--------------------------------|-----------------|-----------------|----------------|---------------------------------------|---------------------------------------|
| 0 <sup>b</sup>                 | 185             | --              | 171            | 14                                    | --                                    |
| 0 <sup>c</sup>                 | 186             | --              | 171            | 15                                    | --                                    |
| 1.0                            | 188             | 224             | 173            | 15                                    | 51                                    |
| 3.2                            | 190             | 232             | 173            | 17                                    | 59                                    |
| 10                             | 190             | 240             | 175            | 15                                    | 65                                    |
| 32                             | --              | 246             | 195            | 51                                    | --                                    |
| 100                            | --              | 245             | 213            | 32                                    | --                                    |

<sup>a</sup>The transition temperatures were determined by the peaks at  $d\chi_M T/dT$  vs.  $T$  plots.

<sup>b</sup>As  $P_{CO_2} = 0$  kPa,  $P_{He} = 100$  kPa was filled in the gas cell instead of vacuum.

<sup>c</sup>As  $P_{CO_2} = 0$  kPa, magnetic measurements were performed under vacuum.

## Determination of the CO<sub>2</sub>-admixed states of framework **1** at different CO<sub>2</sub> pressures

From the magnetic characterisation under varied CO<sub>2</sub> pressure, it is evident that the CO<sub>2</sub> admixed states stabilize the LS states. Thus, the % of CO<sub>2</sub> admixed states present at different P<sub>CO<sub>2</sub></sub> was determined by the following equations.

$$\gamma_{HS} = \frac{(\chi_{MT})_P - (\chi_{MT})_{100}}{(\chi_{MT})_{He} - (\chi_{MT})_{100}} \quad \text{---- Eq 2}$$

$$\% \text{ of } \mathbf{1}' = 100 \times (1 - \gamma_{HS}) \quad \text{---- Eq 3}$$

Where,  $\gamma_{HS}$  represents the residual HS fraction under consecutive P<sub>CO<sub>2</sub></sub>,  $(\chi_{MT})_P$ ,  $(\chi_{MT})_{100}$ , and  $(\chi_{MT})_{He}$ , represents the magnetic susceptibility values of framework **1** at the consecutive P<sub>CO<sub>2</sub></sub>, 100 kPa CO<sub>2</sub> pressure and 100 kPa He pressure, respectively.

**Table S2. determination of CO<sub>2</sub> admixed states of framework **1** at different CO<sub>2</sub> pressures**

| temperature                                                       | 190 K   | 196 K   | 200 K   | 206 K   |
|-------------------------------------------------------------------|---------|---------|---------|---------|
| pressure                                                          | 1.0 kPa | 3.2 kPa | 10 kPa  | 32 kPa  |
| $\chi_{MT}$ of <b>1</b> under 100 kPa He                          | 3.55    | 3.55    | 3.55    | 3.55    |
| $\chi_{MT}$ of <b>1</b> under respective CO <sub>2</sub> pressure | 1.14178 | 0.69157 | 0.28053 | 0.20539 |
| $\chi_{MT}$ of <b>1</b> under 100 kPa CO <sub>2</sub>             | 0.18509 | 0.20276 | 0.20844 | 0.20939 |
| % of <b>1</b> in HS                                               | 28.411  | 14.57   | 2.154   | 0.12    |
| Ratio of <b>1</b> in LS(%)                                        | 71.589  | 85.43   | 97.846  | 99.88   |

| temperature                                                       | 210 K   | 216 K   | 220 K   | 226 K   |
|-------------------------------------------------------------------|---------|---------|---------|---------|
| pressure                                                          | 1.0 kPa | 3.2 kPa | 10 kPa  | 32 kPa  |
| $\chi_{MT}$ of <b>1</b> under 100 kPa He                          | 3.55    | 3.55    | 3.55    | 3.55    |
| $\chi_{MT}$ of <b>1</b> under respective CO <sub>2</sub> pressure | 2.1561  | 0.90641 | 0.29933 | 210.054 |
| $\chi_{MT}$ of <b>1</b> under 100 kPa CO <sub>2</sub>             | 0.20743 | 0.20616 | 0.20806 | 0.21714 |
| % of <b>1</b> in HS                                               | 58.243  | 24.235  | 3.692   | 0.584   |
| Ratio of <b>1</b> in LS(%)                                        | 41.757  | 75.765  | 96.308  | 99.416  |

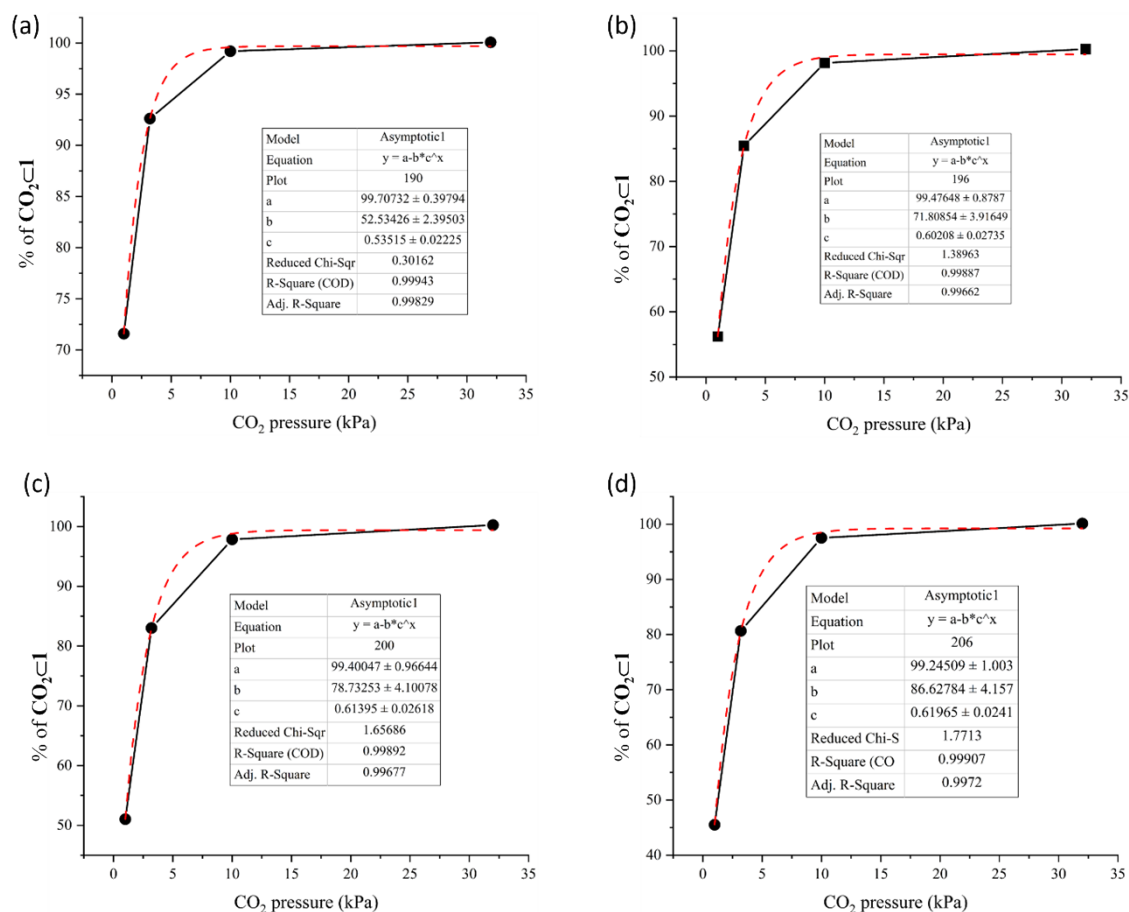

**Figure S 11.** Determination of the CO<sub>2</sub>-admixed states of **1** at (a) 190 K, (b) 196 K, (c) 200 K and (d) 206 K. Red dashed line indicates the exponential fit.



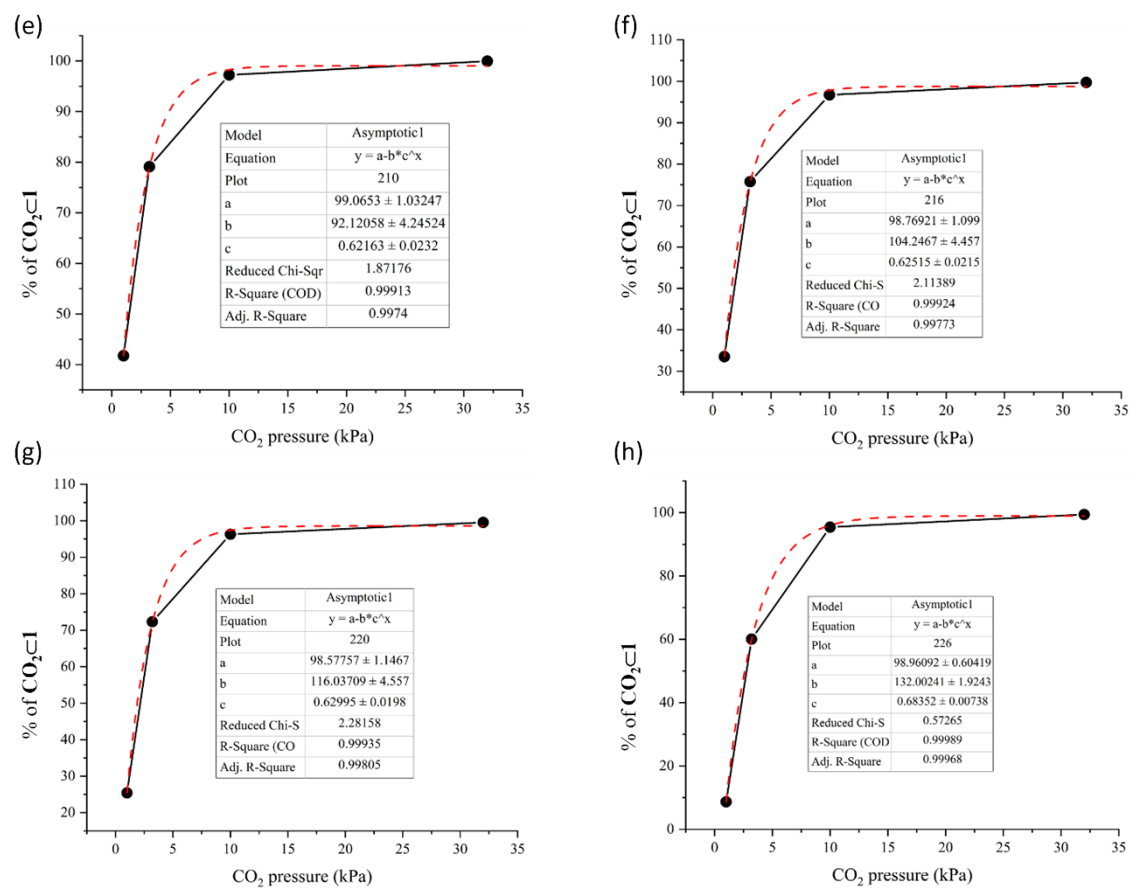

**Figure S11 (continued).** Determination of the CO<sub>2</sub>-admixed states of **1** at (a) 210 K, (b) 216 K, (c) 220 K and (d) 226 K. Red dashed line indicates the exponential fit.

## ***In situ* VT-PXRD of framework 1 under CO<sub>2</sub>**

*In situ* variable-temperature (VT)-PXRD measurements were conducted to investigate the relationship between SCO and gated CO<sub>2</sub> adsorption in detail. For all conditions, measurements began at 260 K at fixed CO<sub>2</sub> pressure.

Figure S12a shows the PXRD pattern under 100 kPa of CO<sub>2</sub>. Upon cooling, the PXRD pattern changed abruptly at around 225 K, which agrees with the temperature where gated CO<sub>2</sub> adsorption begins (Figure 3c). Since the PXRD pattern below 220 K was different from that of **1<sub>ls</sub>** (Figure S4), the observed patterns are assigned to that of **1'<sub>ls</sub>**. In the present experiment, no intermediate phase was observed between **1<sub>hs</sub>** and **1'<sub>ls</sub>** in the cooling process, indicating that SCO was closely associated with the gated CO<sub>2</sub> adsorption. These results agree with the scheme shown in Figure 6b (**1<sub>hs</sub>** → **1'<sub>ls</sub>**). Whereas, upon heating, the abrupt peak change was firstly observed at 245 K, then 255 K, which agrees with the temperatures of SCO (Figure 4c) and gated CO<sub>2</sub> desorption (Figure 3c), respectively. The pattern at 260 K was the same as the initial state, *i.e.*, **1<sub>hs</sub>**. Consequently, the PXRD pattern at 250 K was assigned to **1'<sub>hs</sub>**. These results agree with the scheme of the two-step phase transition shown in Figure 6d (**1'<sub>ls</sub>** → **1'<sub>hs</sub>** → **1<sub>hs</sub>**). These results also indicate that all four states, *i.e.*, **1<sub>hs</sub>**, **1<sub>ls</sub>**, **1'<sub>hs</sub>**, and **1'<sub>ls</sub>**, are distinguishable in PXRD patterns.

Figure S12b shows the PXRD pattern under 32 kPa of CO<sub>2</sub>. Upon cooling, the PXRD pattern changed abruptly at around 205 K, which agrees with the temperature where gated CO<sub>2</sub> adsorption begins (Figure 3c). This indicates the occurrence of SCO associated with gated CO<sub>2</sub> adsorption (**1<sub>hs</sub>** → **1'<sub>ls</sub>**). Upon heating, the abrupt peak change was observed at 245 K, which agrees with the temperatures of both SCO (Figure 4c) and gated CO<sub>2</sub> desorption (Figure 3c). Thus, PXRD patterns changed from **1'<sub>ls</sub>** to **1<sub>hs</sub>**; different from PXRD under 100 kPa of CO<sub>2</sub>, **1'<sub>hs</sub>** was not observed.

Figure S12c and d show the PXRD pattern under 10 and 3.2 kPa of CO<sub>2</sub>, respectively. Upon cooling, the change of PXRD pattern was recognised at around 180 K. Judging from the PXRD pattern, the patterns below 180 K contain both **1<sub>ls</sub>** and **1'<sub>ls</sub>**. This indicates the occurrence of both temperature-induced SCO (**1<sub>hs</sub>** → **1<sub>ls</sub>**) and CO<sub>2</sub>-adsorption-induced SCO (**1<sub>hs</sub>** → **1'<sub>ls</sub>**), which qualitatively agrees with the scheme shown in Figure 6a. Upon heating, the change of the PXRD pattern was recognised at around 190 K, which agrees with the SCO temperature of **1**, *i.e.*, **1<sub>ls</sub>** → **1<sub>hs</sub>** (Figure 4c). Then, the second peak change was observed at 240 and 230 K for 10 and 3.2 kPa of CO<sub>2</sub>, respectively. These temperatures are slightly higher than gated CO<sub>2</sub> desorption temperature (Figure 3c), though they almost agree with SCO temperature at each CO<sub>2</sub> pressure (Figure 4c). Thus, the second peak shift can be ascribed to **1'<sub>ls</sub>** → **1<sub>hs</sub>**. Totally in the heating process, a two-step transition involving phase mixing was observed (**1<sub>ls</sub>** + **1'<sub>ls</sub>** → **1<sub>hs</sub>** + **1'<sub>ls</sub>** → **1<sub>hs</sub>**), which qualitatively agrees with the scheme shown in Figure 6c.

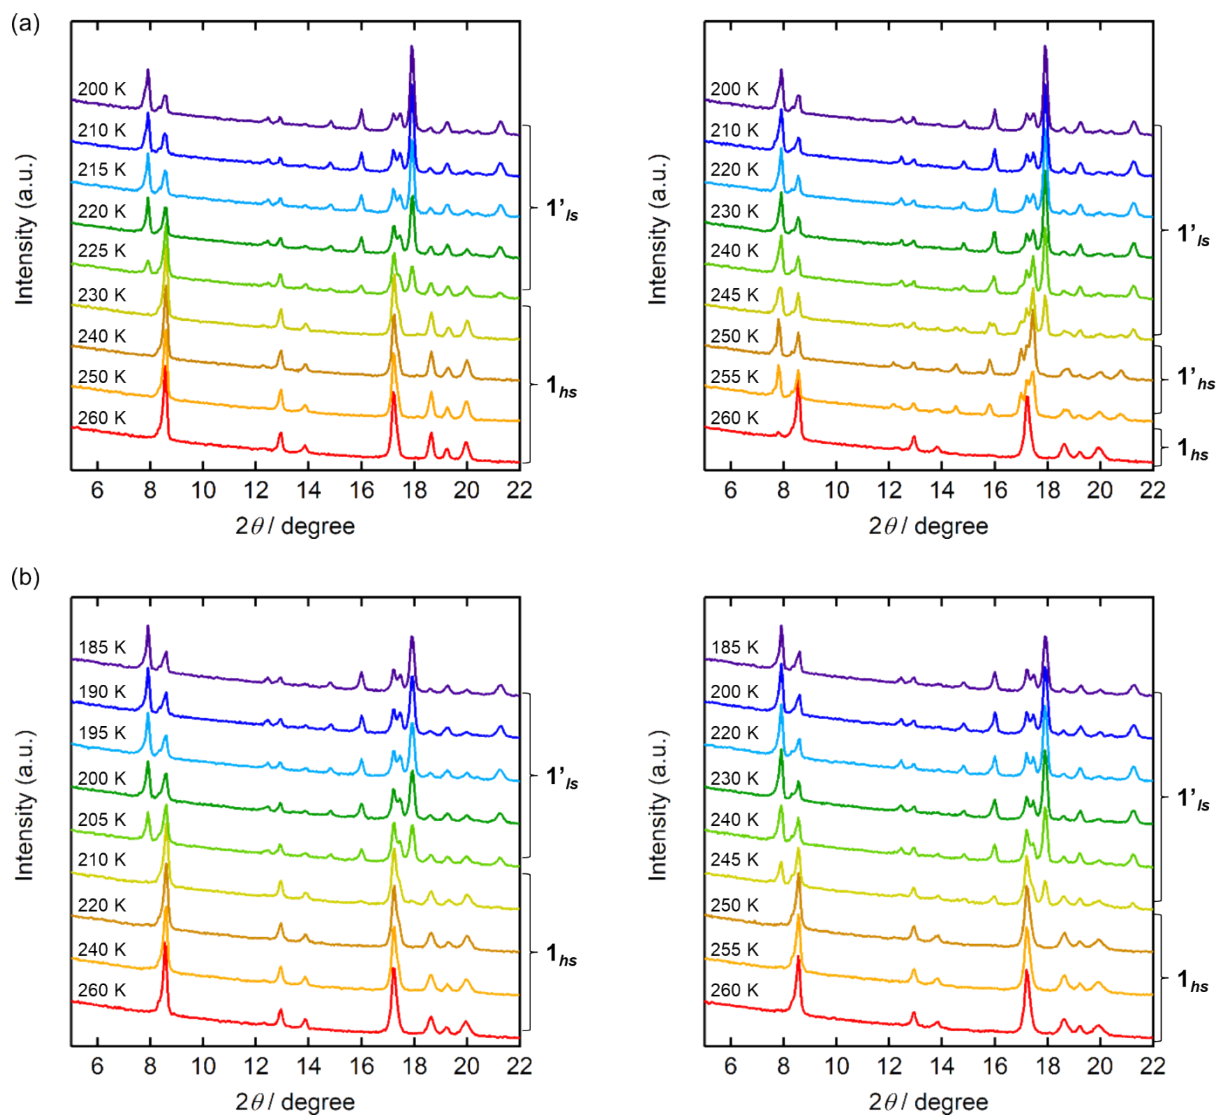

**Figure S12.** Variable temperature PXRD measurement of framework **1** under (a) 100 and (b) 32 kPa of CO<sub>2</sub> while cooling (left) and heating (right). To avoid the influence of diffraction peaks from ice adhering to the capillary, only the region below 22° is shown.

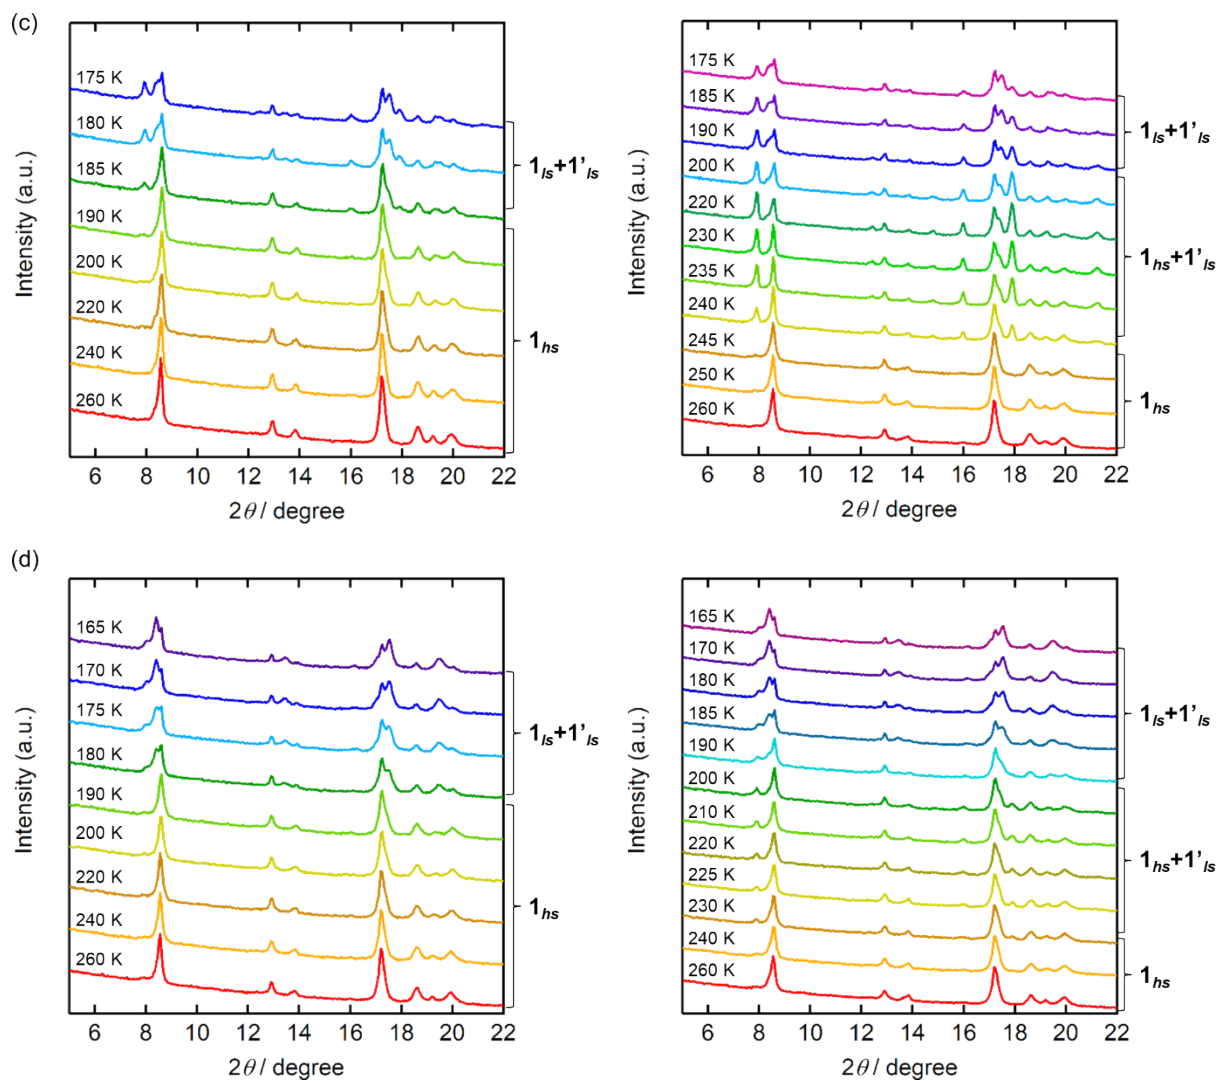

**Figure S12 (Continued).** Variable temperature PXRD measurement of **1** under (c) 10 and (b) 3.2 kPa of CO<sub>2</sub> while cooling (left) and heating (right). To avoid the influence of diffraction peaks from ice adhering to the capillary, only the region below 22° is shown.

## Crystallographic details of 1·CS<sub>2</sub>

**Table S3.** Crystallographic data for 1·CS<sub>2</sub>

|                                             |                                                                                                               |
|---------------------------------------------|---------------------------------------------------------------------------------------------------------------|
| Empirical formula                           | C <sub>38</sub> H <sub>28</sub> Fe <sub>2</sub> N <sub>12</sub> O <sub>8</sub> Pd <sub>2</sub> S <sub>4</sub> |
| Formula weight                              | 1233.46                                                                                                       |
| Temperature/K                               | 293(2)                                                                                                        |
| Crystal system                              | monoclinic                                                                                                    |
| Space group                                 | I2/c                                                                                                          |
| a/Å                                         | 7.3750(7)                                                                                                     |
| b/Å                                         | 21.731(2)                                                                                                     |
| c/Å                                         | 14.3104(13)                                                                                                   |
| α/°                                         | 90                                                                                                            |
| β/°                                         | 90.310(3)                                                                                                     |
| γ/°                                         | 90                                                                                                            |
| Volume/Å <sup>3</sup>                       | 2293.4(4)                                                                                                     |
| Z                                           | 2                                                                                                             |
| ρ <sub>calc</sub> /cm <sup>3</sup>          | 1.786                                                                                                         |
| μ/mm <sup>-1</sup>                          | 1.638                                                                                                         |
| F(000)                                      | 1224.0                                                                                                        |
| Radiation                                   | MoKα (λ = 0.71073)                                                                                            |
| 2θ range for data collection/°              | 5.834 to 49.564                                                                                               |
| Index ranges                                | -8 ≤ h ≤ 8, -25 ≤ k ≤ 25, -16 ≤ l ≤ 16                                                                        |
| Reflections collected                       | 31892                                                                                                         |
| Independent reflections                     | 1897 [R <sub>int</sub> = 0.0356, R <sub>sigma</sub> = 0.0140]                                                 |
| Data/restraints/parameters                  | 1897/0/144                                                                                                    |
| Goodness-of-fit on F <sup>2</sup>           | 1.186                                                                                                         |
| Final R indexes [I ≥ 2σ (I)]                | R <sub>1</sub> = 0.0466, wR <sub>2</sub> = 0.1223                                                             |
| Final R indexes [all data]                  | R <sub>1</sub> = 0.0468, wR <sub>2</sub> = 0.1225                                                             |
| Largest diff. peak/hole / e Å <sup>-3</sup> | 1.18/-0.60                                                                                                    |

**Table S4.** Selected bond lengths for 1·CS<sub>2</sub>

| Atom | Atom              | Length/Å | Atom | Atom | Length/Å  |
|------|-------------------|----------|------|------|-----------|
| Pd01 | C008              | 1.988(6) | O00G | C00N | 1.208(9)  |
| Pd01 | C008 <sup>1</sup> | 1.988(6) | N004 | C009 | 1.155(8)  |
| Pd01 | C009 <sup>2</sup> | 1.980(6) | N005 | C008 | 1.155(8)  |
| Pd01 | C009 <sup>3</sup> | 1.980(6) | N00C | C00I | 1.340(8)  |
| Fe02 | N004 <sup>4</sup> | 2.030(5) | N00C | C00K | 1.344(8)  |
| Fe02 | N004              | 2.030(5) | C00I | C00L | 1.380(9)  |
| Fe02 | N005              | 2.041(5) | C00K | C00Q | 1.376(10) |
| Fe02 | N005 <sup>4</sup> | 2.041(5) | C00L | C00O | 1.388(9)  |
| Fe02 | N00C              | 2.117(5) | C00N | C00O | 1.493(10) |
| Fe02 | N00C <sup>4</sup> | 2.117(5) | C00O | C00Q | 1.391(10) |
| O00D | C00N              | 1.342(8) | S1   | C3   | 1.468(18) |
| O00D | C00U              | 1.449(8) |      |      |           |

<sup>1</sup>1-X,+Y,1/2-Z; <sup>2</sup>-X,+Y,1/2-Z; <sup>3</sup>1+X,+Y,+Z; <sup>4</sup>-X,-Y,1-Z

**Table S5.** Selected bond angles for **1·CS<sub>2</sub>**

|                   |      |                   |           |                 |      |                   |          |
|-------------------|------|-------------------|-----------|-----------------|------|-------------------|----------|
| C008              | Pd01 | C008 <sup>1</sup> | 176.7(3)  | N00C            | Fe02 | N00C <sup>4</sup> | 180.0    |
| C009 <sup>2</sup> | Pd01 | C008 <sup>1</sup> | 91.4(2)   | C00N            | O00D | C00U              | 115.0(5) |
| C009 <sup>3</sup> | Pd01 | C008              | 91.4(2)   | C009            | N004 | Fe02              | 172.7(4) |
| C009 <sup>3</sup> | Pd01 | C008 <sup>1</sup> | 88.6(2)   | C008            | N005 | Fe02              | 174.9(4) |
| C009 <sup>2</sup> | Pd01 | C008              | 88.6(2)   | C00I            | N00C | Fe02              | 120.2(4) |
| C009 <sup>2</sup> | Pd01 | C009 <sup>3</sup> | 178.7(3)  | C00I            | N00C | C00K              | 116.3(6) |
| N004              | Fe02 | N004 <sup>4</sup> | 180.0(2)  | C00K            | N00C | Fe02              | 123.1(4) |
| N004              | Fe02 | N005              | 89.81(18) | N005            | C008 | Pd01              | 176.1(5) |
| N004 <sup>4</sup> | Fe02 | N005              | 90.19(18) | N004            | C009 | Pd01 <sup>5</sup> | 176.3(5) |
| N004              | Fe02 | N005 <sup>4</sup> | 90.19(18) | N00C            | C00I | C00L              | 123.9(6) |
| N004 <sup>4</sup> | Fe02 | N005 <sup>4</sup> | 89.81(18) | N00C            | C00K | C00Q              | 124.1(6) |
| N004 <sup>4</sup> | Fe02 | N00C              | 89.11(18) | C00I            | C00L | C00O              | 118.5(6) |
| N004              | Fe02 | N00C              | 90.89(18) | O00D            | C00N | C00O              | 111.3(6) |
| N004              | Fe02 | N00C <sup>4</sup> | 89.11(18) | O00G            | C00N | O00D              | 124.2(7) |
| N004 <sup>4</sup> | Fe02 | N00C <sup>4</sup> | 90.89(18) | O00G            | C00N | C00O              | 124.5(6) |
| N005              | Fe02 | N005 <sup>4</sup> | 180.0     | C00L            | C00O | C00N              | 123.3(6) |
| N005              | Fe02 | N00C              | 88.76(18) | C00L            | C00O | C00Q              | 118.5(6) |
| N005              | Fe02 | N00C <sup>4</sup> | 91.24(18) | C00Q            | C00O | C00N              | 118.3(6) |
| N005 <sup>4</sup> | Fe02 | N00C              | 91.24(18) | C00K            | C00Q | C00O              | 118.5(6) |
| N005 <sup>4</sup> | Fe02 | N00C <sup>4</sup> | 88.76(18) | S1 <sup>6</sup> | C3   | S1                | 180.0    |

<sup>1</sup>1-X,+Y,1/2-Z; <sup>2</sup>-X,+Y,1/2-Z; <sup>3</sup>1+X,+Y,+Z; <sup>4</sup>-X,-Y,1-Z; <sup>5</sup>-1+X,+Y,+Z; <sup>6</sup>1/2-X,1/2-Y,1/2-Z

**Table S6.** Torsional angles for **1·CS<sub>2</sub>**

| A    | B    | C    | D    | Angle/°   | A    | B    | C    | D    | Angle/°  |
|------|------|------|------|-----------|------|------|------|------|----------|
| Fe02 | N00C | C00I | C00L | 179.2(5)  | C00I | N00C | C00K | C00Q | -2.4(9)  |
| Fe02 | N00C | C00K | C00Q | 175.1(5)  | C00I | C00L | C00O | C00N | 178.8(6) |
| O00D | C00N | C00O | C00L | 11.9(9)   | C00I | C00L | C00O | C00Q | -2.7(9)  |
| O00D | C00N | C00O | C00Q | -166.6(6) | C00K | N00C | C00I | C00L | -6.2(9)  |
| O00G | C00N | C00O | C00L | -168.9(7) | C00L | C00O | C00Q | C00K | -0.8(9)  |
| O00G | C00N | C00O | C00Q | 12.6(10)  | C00N | C00O | C00Q | C00K | 177.8(6) |
| N00C | C00I | C00L | C00O | 6.5(9)    | C00U | O00D | C00N | O00G | -1.2(9)  |
| N00C | C00K | C00Q | C00O | 1.0(10)   | C00U | O00D | C00N | C00O | 178.0(5) |

## Structural diagram for $1 \cdot \text{CS}_2$

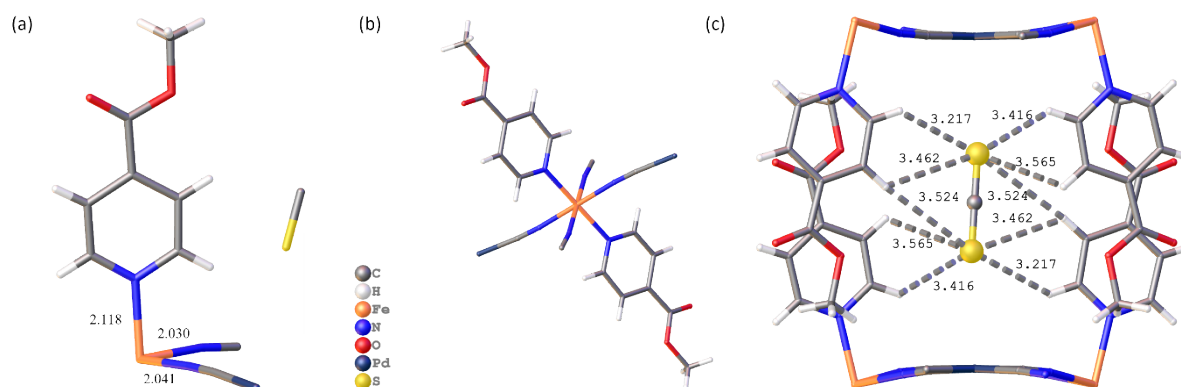

**Figure S13.** (a) Asymmetric unit of  $1 \cdot \text{CS}_2$ , indicating Fe-N bond lengths; (b) a single  $[\text{FeN}_6]$  unit of  $1 \cdot \text{CS}_2$  framework; (c)  $\text{S} \cdots \text{Pd}$  short contacts and the array of  $\text{C-H} \cdots \text{S}$  bonding stabilizing the  $\text{CS}_2$  molecule inside the framework channel. Color code: grey, C; red, O; blue, N; yellow, S; orange, Fe; navy, Pd.

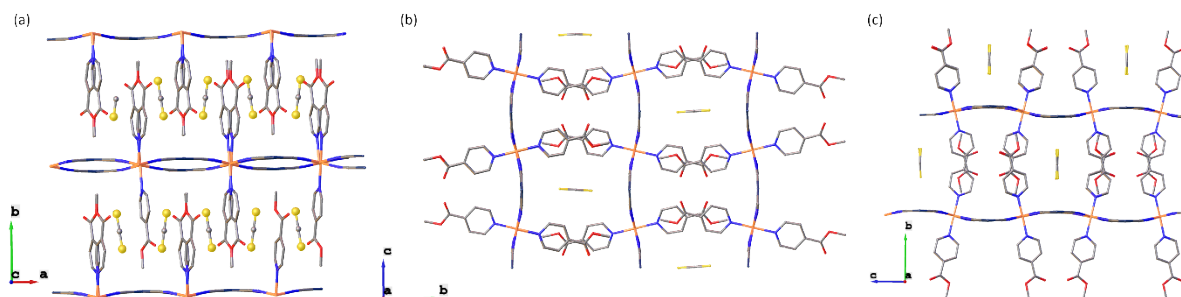

**Figure S 14.** Molecular packing diagram of  $1 \cdot \text{CS}_2$  along crystallographic axes  $a$ ,  $b$  and  $c$ , respectively.

## References in ESI

1. Mondal, D. J.; Mondal, A.; Paul, A.; Konar, S., Guest-Induced Multistep-to-One-Step Reversible Spin Transition with Enhanced Hysteresis in a 2D Hofmann Framework. *Inorg. Chem.* **2022**, *61* (11), 4572-4580.
2. Numaguchi, R.; Tanaka, H.; Watanabe, S.; Miyahara, M. T., Simulation study for adsorption-induced structural transition in stacked-layer porous coordination polymers: Equilibrium and hysteretic adsorption behaviors. *J. Chem. Phys.* **2013**, *138* (5).
